# Supplementary material for: Nitrogenase resurrection and the evolution of a singular enzymatic mechanism
Source: eLife. 2023 Feb 17;12:e85003. doi: 10.7554/eLife.85003 (PMC9977276; doi:10.7554/eLife.85003)
Supplement: Figure 3—source data 1. [file elife-85003-fig3-data1.xlsx]

## Sheet: Raw data
hour	WT-rep1	DJ2278-rep1	Anc1A-rep1	Anc1B-rep1	Anc2-rep1	WT-rep2	DJ2278-rep2	Anc1A-rep2	Anc2-rep2	Anc1B-rep2	WT-rep3	DJ2278-rep3	Anc1A-rep3	Anc2-rep3	Anc1B-rep3	WT-rep4	DJ2278-rep4	Anc1A-rep4	Anc2-rep4	Anc1B-rep4	WT-rep5	DJ2278-rep5	Anc1A-rep5	Anc2-rep5	Anc1B-rep5
0	0.01	0.01	0.01	0.01	0.01	0.01	0.01	0.01	0.01	0.01	0.01	0.01	0.01	0.01	0.01	0.01	0.01	0.01	0.01	0.01	0.01	0.01	0.01	0.01	0.01
2	0.014	0.012	0.018	0.031	0.018	0.015	0.015	0.016	0.017	0.018	0.012	0.011	0.011	0.011	0.012	0.013	0.012	0.014	0.015	0.014	0.013	0.014	0.013	0.013	0.015
4	0.04	0.05	0.07	0.07	0.05	0.015	0.014	0.015	0.015	0.015	0.014	0.012	0.015	0.014	0.016	0.015	0.014	0.016	0.017	0.016	0.012	0.011	0.012	0.011	0.013
6	0.014	0.012	0.018	0.018	0.015	0.018	0.016	0.017	0.017	0.02	0.012	0.017	0.018	0.015	0.014	0.013	0.012	0.016	0.015	0.015	0.014	0.016	0.014	0.012	0.015
8	0.018	0.012	0.02	0.021	0.014	0.018	0.012	0.017	0.016	0.019	0.017	0.008	0.011	0.009	0.015	0.019	0.012	0.02	0.016	0.019	0.053	0.043	0.047	0.042	0.056
14	0.065	0.007	0.05	0.043	0.013	na	na	na	na	na	0.043	0.015	0.03	0.013	0.029	0.166	0.018	0.1	0.031	0.07	0.149	0.025	0.068	0.031	0.077
15	na	na	na	na	na	0.128	0.008	0.05	0.013	0.048	na	na	na	na	na	na	na	na	na	na	na	na	na	na	na
16	0.194	0.044	0.126	0.112	0.053	na	na	na	na	na	0.09	0.016	0.048	0.021	0.048	0.27	0.017	0.176	0.039	0.113	0.26	0.015	0.109	0.025	0.11
17	na	na	na	na	na	0.234	0.006	0.08	0.013	0.074	na	na	na	na	na	na	na	na	na	na	na	na	na	na	na
18	0.282	0.005	0.164	0.12	0.019	na	na	na	na	na	0.185	0.008	0.081	0.013	0.06	0.472	0.014	0.27	0.043	0.185	0.428	0.015	0.202	0.031	0.176
19	na	na	na	na	na	0.43	0.006	0.155	0.021	0.128	na	na	na	na	na	na	na	na	na	na	na	na	na	na	na
20	0.562	0.007	0.294	0.244	0.03	na	na	na	na	na	0.335	0.033	0.162	0.038	0.138	1.12	0.013	0.574	0.053	0.338	1.016	0.011	0.372	0.039	0.344
21	na	na	na	na	na	1.07	0.008	0.276	0.029	0.261	na	na	na	na	na	na	na	na	na	na	na	na	na	na	na
22	0.843	0.007	0.441	0.366	0.03	na	na	na	na	na	0.616	0.003	0.254	0.015	0.2	2.23	0.021	1.53	0.08	1.01	2	0.011	0.906	0.046	0.938
23	na	na	na	na	na	2.17	0.005	0.78	0.034	0.594	na	na	na	na	na	na	na	na	na	na	na	na	na	na	na
24	2.387	0.004	1.62	1.3	0.041	na	na	na	na	na	1.99	0.014	0.866	0.06	0.687	3.68	0.022	2.546	0.188	2.329	3.528	0.01	2.376	0.087	2.604
25	na	na	na	na	na	3.768	0.024	2.1	0.058	1.872	na	na	na	na	na	na	na	na	na	na	na	na	na	na	na
26	3.38	0.005	2.47	2.35	0.063	na	na	na	na	na	2.82	0.001	1.25	0.0458	1.003	4.163	0.004	3.462	0.19	3.132	4.188	0.018	3.552	0.136	3.732
27	na	na	na	na	na	4.416	0.006	2.58	0.059	2.46	na	na	na	na	na	na	na	na	na	na	na	na	na	na	na
28	3.98	0.004	3.43	3.6	0.089	na	na	na	na	na	2.924	0.002	2.088	0.0527	1.969	5.24	0.002	4.644	0.27	4.314	5.088	0.025	4.464	0.171	4.584
29	na	na	na	na	na	5.32	0.006	3.612	0.098	3.504	na	na	na	na	na	na	na	na	na	na	na	na	na	na	na
30	5.06	0.004	4.49	4.9	0.145	na	na	na	na	na	5.22	0.001	2.933	0.0779	3.06	5.908	0.003	5.936	0.273	5.523	6.288	0.009	6.288	0.259	5.928
31	na	na	na	na	na	6.192	0.008	4.8	0.137	4.704	na	na	na	na	na	na	na	na	na	na	na	na	na	na	na
32	5.62	0.002	5.23	5.93	0.205	na	na	na	na	na	6.51	0.002	4.507	0.108	4.644	7.2	0.024	7.29	0.654	7.11	6.744	0.01	6.6	0.447	6.744
33	na	na	na	na	na	6.216	0.002	4.632	0.213	4.872	na	na	na	na	na	na	na	na	na	na	na	na	na	na	na
38	na	na	na	na	na	na	na	na	na	na	8.55	0.004	6.21	0.33	7.44	6.57	0.012	7.38	2.7	7.62	8.4	0.028	7.56	3.15	8.55
39	6.54	0.004	6.27	8.31	1.86	7.65	0.008	6.51	2.37	7.05	na	na	na	na	na	na	na	na	na	na	na	na	na	na	na
40	na	na	na	na	na	na	na	na	na	na	9.15	0.006	6.72	0.639	8.13	7.59	0.008	8.22	3.15	7.56	8.07	0.013	7.2	3.3	8.46
41	7.14	0.004	7.08	8.7	2.58	7.8	0.01	6.72	3.24	7.26	na	na	na	na	na	na	na	na	na	na	na	na	na	na	na
42	na	na	na	na	na	na	na	na	na	na	9.3	0.004	6.9	1.2	8.4	8.07	0.008	8.25	3.72	7.53	8.58	0.017	7.89	4.26	8.22
43	7.8	0.003	7.11	9.03	3.33	8.55	0.006	6.93	3.84	7.68	na	na	na	na	na	na	na	na	na	na	na	na	na	na	na
44	na	na	na	na	na	na	na	na	na	na	9.48	0.004	7.08	2.04	8.67	8.4	0.008	8.85	4.29	8.46	8.76	0.015	8.4	4.89	8.73
45	7.86	0.004	7.56	9.69	4.11	9.87	0.03	7.8	5.43	8.31	na	na	na	na	na	na	na	na	na	na	na	na	na	na	na
46	na	na	na	na	na	na	na	na	na	na	9.87	0.011	7.53	3.06	8.67	8.4	0.008	9.15	4.44	8.64	8.88	0.016	9.3	5.52	9.63
47	8.28	0.003	7.74	9.84	4.77	9.18	0.006	7.68	5.22	7.86	na	na	na	na	na	na	na	na	na	na	na	na	na	na	na
48	na	na	na	na	na	na	na	na	na	na	13.905	0.018	11.047	5.167	11.597	8.64	0.009	9.39	5.43	9.57	8.88	0.009	9.27	5.91	9.42
49	9.12	0.024	9.72	10.14	5.184	10.076	0.016	8.01	6.55	8.446	na	na	na	na	na	na	na	na	na	na	na	na	na	na	na
50	na	na	na	na	na	na	na	na	na	na	11.432	0.001	8.849	4.562	11.212	9.57	0.016	10.62	5.88	10.17	9.42	0.008	9.78	6.33	9.84
51	7.38	0.004	7.8	8.4	5.808	10.497	0.001	9.068	6.65	10.305	na	na	na	na	na	na	na	na	na	na	na	na	na	na	na
52	na	na	na	na	na	na	na	na	na	na	11.652	0.001	9.453	5.276	11.157	10.23	0.024	10.62	6.39	10.65	9.6	0.009	10.5	6.9	10.92
53	9.024	0.007	8.928	11.208	6.312	11.267	0.002	10.058	7.2	10.38	na	na	na	na	na	na	na	na	na	na	na	na	na	na	na
54	na	na	na	na	na	na	na	na	na	na	12.201	0.002	10.552	5.936	11.322	10.14	0.008	10.98	6.45	10.47	9.72	0.009	10.92	7.14	11.01
55	9.48	0.008	9.78	12.06	7.68	11.652	0	9.838	7.42	10.39	na	na	na	na	na	na	na	na	na	na	na	na	na	na	na
56	na	na	na	na	na	na	na	na	na	na	12.36	0.021	7.29	6.81	12.54	10.41	0.008	11.52	6.81	11.28	9.96	0.008	11.4	7.56	11.46
57	9.504	0	8.952	11.376	6.864	12.64	0.002	10.552	8.409	11.377	na	na	na	na	na	na	na	na	na	na	na	na	na	na	na
62	na	na	na	na	na	na	na	na	na	na	12.5	0.004	9.84	7.11	11.8	11	0.026	12.9	7.92	12.4	9.9	0.015	11.9	8.82	11.7
63	10.4	0.006	10.8	11.8	8.79	11.3	0.006	10.9	8.22	10.1	na	na	na	na	na	na	na	na	na	na	na	na	na	na	na
64	na	na	na	na	na	na	na	na	na	na	13.4	0.004	11	7.5	12.5	11.07	0.012	12.2	8.07	11.9	10	0.015	12.5	8.55	11.6
65	10.6	0.006	11	12	9.18	11.7	0.006	11.3	8.76	10.4	na	na	na	na	na	na	na	na	na	na	na	na	na	na	na
66	na	na	na	na	na	na	na	na	na	na	12.9	0.004	10.8	7.77	12.1	11.7	0.014	12.8	8.46	12.2	10.3	0.015	12.2	9.36	11.8
67	10.9	0.004	11.1	11.8	9.84	12.2	0.006	11.9	9.3	11.2	na	na	na	na	na	na	na	na	na	na	na	na	na	na	na
68	na	na	na	na	na	na	na	na	na	na	13.5	0.004	11.2	8.13	12.3	10.9	0.014	12.7	8.52	12	10.1	0.016	12.2	9.63	12
69	11.7	0.032	11.9	12.3	10.4	12	0.006	12.2	9.66	10.9	na	na	na	na	na	na	na	na	na	na	na	na	na	na	na
70	na	na	na	na	na	na	na	na	na	na	13.4	0.003	10.8	8.19	11.9	11.6	0.015	12.6	8.94	11.7	10.89	0.016	12.1	10.1	11.7
71	11.7	0.005	11.3	11.5	10.9	11.3	0.008	11.4	10.3	11	na	na	na	na	na	na	na	na	na	na	na	na	na	na	na
72	na	na	na	na	na	na	na	na	na	na	12.912	0.006	11.49	9.12	12.51	11.64	0.01	12.09	9.06	11.49	11.34	0.022	11.91	10.5	11.91
73	11.537	0.015	11.386	12.04	11.336	12.366	0.021	12.86	11.487	12.476	na	na	na	na	na	na	na	na	na	na	na	na	na	na	na

## Sheet: Growthcurver output
sample	k	n0	r	t_mid	t_gen	auc_l	auc_e	sigma	note	mean_t_gen	std.dev_t_gen	mean_k	std.dev_k	mean_t_mid	std.dev_t_mid	mean_sigma	std.dev_sigma
DJ2278-rep1	0	0	0	0	0	0	0	0	cannot fit data	na	na	na	na	na	na	na	na
DJ2278-rep2	0	0	0	0	0	0	0	0	cannot fit data
DJ2278-rep3	0	0	0	0	0	0	0	0	cannot fit data
DJ2278-rep4	421.839	0.012567	0.000588568	17706.2	1177.68	0.924272	0.976	0.00627751
DJ2278-rep5	0.015	0.017002	0.0209134	-102.288	33.1437	1.15087	1.174	0.00749718	questionable fit (k < n0)
WT-rep1	11.1298	0.206661	0.109563	36.2124	6.32644	409.324	401.701	0.766815		5.14326	1.07844	11.437	1.13132	33.0999	2.87122	0.707921	0.0890206
WT-rep2	11.9586	0.156531	0.12885	33.5489	5.3795	471.129	463.771	0.699661
WT-rep3	12.9818	0.0521352	0.15947	34.5735	4.34657	485.745	481.658	0.754265
WT-rep4	11.1975	0.240651	0.117086	32.6117	5.91998	439.919	431.978	0.762659
WT-rep5	9.91737	0.0499302	0.185144	28.5528	3.74383	430.629	424.244	0.556204
Anc1A-rep1	11.3	0.152177	0.1133	37.8989	6.11778	397.142	390.752	0.730101		5.69694	0.702772	11.7559	0.750196	36.9652	2.12835	0.756034	0.0756235
Anc1A-rep2	12.2201	0.157949	0.108582	39.9287	6.3836	405.732	398.217	0.641281
Anc1A-rep3	10.668	0.0367581	0.152483	37.1661	4.54573	371.713	362.366	0.841708
Anc1A-rep4	12.4714	0.18354	0.120809	34.7981	5.73753	463.577	460.068	0.774001
Anc1A-rep5	12.1198	0.16873	0.121603	35.0343	5.70008	447.725	443.356	0.793077
Anc1B-rep1	11.6347	0.048853	0.159994	34.1808	4.33233	451.49	448.648	0.71361		4.69368	0.581707	11.6742	0.393239	34.9449	1.77065	0.676432	0.088939
Anc1B-rep2	11.1622	0.0715497	0.138269	36.4758	5.01305	407.686	401.945	0.647717
Anc1B-rep3	12.2127	0.0188711	0.175526	36.8666	3.94897	429.113	428.722	0.539052
Anc1B-rep4	11.8605	0.141917	0.127289	34.6745	5.44544	442.381	441.174	0.774436
Anc1B-rep5	11.5007	0.0969054	0.146586	32.5268	4.72861	453.546	449.846	0.707344
Anc2-rep1	11.2491	0.0153067	0.130074	50.728	5.32887	255.069	244.656	0.400155		4.45524	0.824818	9.60401	1.18668	47.2541	2.33626	0.408615	0.0909156
Anc2-rep2	9.92832	0.00545888	0.162384	46.2197	4.26856	266.635	256.611	0.541021
Anc2-rep3	8.14208	0.000181163	0.220641	48.5546	3.14151	191.102	186.318	0.386464
Anc2-rep4	8.82336	0.0117901	0.146007	45.3167	4.74735	236.571	231.44	0.287761
Anc2-rep5	9.87715	0.0137266	0.14471	45.4514	4.78992	263.578	256.15	0.427676

## Sheet: Statistics
t_gen
WT	Anc1A	Anc1B	Anc2
6.32644	6.11778	4.33233	5.32887
5.3795	6.3836	5.01305	4.26856
4.34657	4.54573	3.94897	3.14151
5.91998	5.73753	5.44544	4.74735
3.74383	5.70008	4.72861	4.78992
ANOVA: Single Factor										TUKEY HSD/KRAMER			alpha	0.05
										group	mean	n	ss	df	q-crit
DESCRIPTION					Alpha	0.05				WT	5.14326	5	4.65213
Group	Count	Sum	Mean	Variance	SS	Std Err	Lower	Upper		Anc1A	5.69694	5	1.97555
WT	5	25.7163	5.14326	1.16303	4.65213	0.365761	4.36788	5.91864		Anc1B	4.69368	5	1.35353
Anc1A	5	28.4847	5.69694	0.493889	1.97555	0.365761	4.92156	6.47232		Anc2	4.45524	5	2.7213
Anc1B	5	23.4684	4.69368	0.338383	1.35353	0.365761	3.9183	5.46906				20	10.7025	16	4.046
Anc2	5	22.2762	4.45524	0.680324	2.7213	0.365761	3.67986	5.23062		Q TEST
										group 1	group 2	mean	std err	q-stat	lower	upper	p-value	mean-crit	Cohen d
ANOVA										WT	Anc1A	0.553681	0.365761	1.51378	-0.92619	2.03355	0.711741	1.47987	0.676981
Sources	SS	df	MS	F	P value	Eta-sq	RMSSE	Omega Sq		WT	Anc1B	0.449584	0.365761	1.22917	-1.03029	1.92945	0.820515	1.47987	0.549702
Between Groups	4.48409	3	1.4947	2.23453	0.123651	0.295266	0.668511	0.156246		WT	Anc2	0.688019	0.365761	1.88106	-0.791851	2.16789	0.558152	1.47987	0.841236
Within Groups	10.7025	16	0.668907							Anc1A	Anc1B	1.00326	0.365761	2.74295	-0.476606	2.48314	0.251292	1.47987	1.22668
Total	15.1866	19	0.799295							Anc1A	Anc2	1.2417	0.365761	3.39484	-0.23817	2.72157	0.117121	1.47987	1.51822
										Anc1B	Anc2	0.238436	0.365761	0.651889	-1.24144	1.71831	0.966473	1.47987	0.291533
t_mid
WT	Anc1A	Anc1B	Anc2
36.2124	37.8989	34.1808	50.728
33.5489	39.9287	36.4758	46.2197
34.5735	37.1661	36.8666	48.5546
32.6117	34.7981	34.6745	45.3167
28.5528	35.0343	32.5268	45.4514
ANOVA: Single Factor										TUKEY HSD/KRAMER			alpha	0.05
										group	mean	n	ss	df	q-crit
DESCRIPTION					Alpha	0.05				WT	33.0999	5	32.9755
Group	Count	Sum	Mean	Variance	SS	Std Err	Lower	Upper		Anc1A	36.9652	5	18.1195
WT	5	165.499	33.0999	8.24388	32.9755	1.03361	30.9087	35.291		Anc1B	34.9449	5	12.5409
Anc1A	5	184.826	36.9652	4.52987	18.1195	1.03361	34.774	39.1564		Anc2	47.2541	5	21.8325
Anc1B	5	174.724	34.9449	3.13522	12.5409	1.03361	32.7537	37.1361				20	85.4684	16	4.046
Anc2	5	236.27	47.2541	5.45813	21.8325	1.03361	45.0629	49.4452		Q TEST
										group 1	group 2	mean	std err	q-stat	lower	upper	p-value	mean-crit	Cohen d
ANOVA										WT	Anc1A	3.86534	1.03361	3.73964	-0.316661	8.04733	0.0752723	4.182	1.67242
Sources	SS	df	MS	F	P value	Eta-sq	RMSSE	Omega Sq		WT	Anc1B	1.84503	1.03361	1.78503	-2.33697	6.02703	0.598497	4.182	0.79829
Between Groups	600.182	3	200.061	37.4521	1.8351e-07	0.875347	2.73686	0.845388		WT	Anc2	14.1542	1.03361	13.6939	9.97222	18.3362	2.38111e-07	4.182	6.12411
Within Groups	85.4684	16	5.34177							Anc1A	Anc1B	2.02031	1.03361	1.95461	-2.16169	6.2023	0.52759	4.182	0.874126
Total	685.65	19	36.0869							Anc1A	Anc2	10.2889	1.03361	9.95429	6.10688	14.4709	1.52218e-05	4.182	4.45169
										Anc1B	Anc2	12.3092	1.03361	11.9089	8.12719	16.4912	1.56088e-06	4.182	5.32582
