# Supplementary material for: Nitrogenase resurrection and the evolution of a singular enzymatic mechanism
Source: eLife. 2023 Feb 17;12:e85003. doi: 10.7554/eLife.85003 (PMC9977276; doi:10.7554/eLife.85003)
Supplement: Figure 3—source data 2. [file elife-85003-fig3-data2.xlsx]

## Sheet: WT
Sample	Acetylene (A) incubation time (h)	Methane (M) (879) peak area	Ethylene (E) peak area	E peak area blanked to 0 mL std	A peak area	A/M peak area	E/M peak area	E (μmol) (calc from std. curve; known values for E stds.)	E (μmol/mg total protein) (total protein calc from Bradford assay)	A reduction rate (μmol/mg/h)
Ethyelen-std_0mL	na	29570	7332	0	43392456	1467.45	0	0	na	na
Ethyelen-std_0.025mL	na	30990	53594	46262	45426841	1465.85	1.4928	1.11607	na	na
Ethyelen-std_0.25mL	na	34322	6037	-1295	48112978	1401.81	na	11.1607	na	na
Ethyelen-std_0.75mL	na	30472	1144169	1136837	45438268	1491.15	37.3076	33.4821	na	na
Ethyelen-std_1.25mL	na	31552	2036463	2029131	46438359	1471.8	64.3107	55.8036	na	na
Ethyelen-std_2.5mL	na	33845	4838085	4830753	47852746	1413.88	142.732	111.607	na	na
WT-rep1	0.25	36288	788975	781643	49871027	1374.31	21.54	18.7291	3.67788	14.604
	0.5	37015	1603043	1595711	50022420	1351.41	43.1098	35.6507	7.00081
	0.75	36177	2476271	2468939	48496221	1340.53	68.2461	55.3701	10.8731
	1	34179	3157320	3149988	45356062	1327.02	92.1615	74.1317	14.5574
WT-rep2	0.25	33099	363221	355889	46473536	1404.08	10.7523	10.2661	2.43517	13.165
	0.5	32709	928139	920807	45748823	1398.66	28.1515	23.9158	5.67292
	0.75	32640	1509955	1502623	45160680	1383.6	46.0362	37.9464	9.00103
	1	32009	2047733	2040401	44217350	1381.4	63.7446	51.8386	12.2963
WT-rep3	0.25	32921	550948	543616	45914680	1394.69	16.5127	14.7852	2.46317	11.504
	0.5	34190	1374739	1367407	47162521	1379.42	39.9944	33.2066	5.53211
	0.75	33025	2059173	2051841	45420491	1375.34	62.1299	50.5719	8.42512
	1	32849	2716862	2709530	44622010	1358.4	82.4844	66.54	11.0853
*not included in standard curve

## Sheet: Anc1A
Sample	Acetylene (A) incubation time (h)	Methane (M) (879) peak area	Ethylene (E) peak area	E peak area blanked to 0 mL std	A peak area	A/M peak area	E/M peak area	E (μmol) (calc from std. curve; known values for E stds.)	E (μmol/mg total protein) (total protein calc from Bradford assay)	A reduction rate (μmol/mg/h)
Ethyelen-std_0mL	na	25616	6716	0	48578006	1896.39	0	0	na	na
Ethyelen-std_0.025mL	na	27654	41299	34583	49828190	1801.84	1.25056	1.11607	na	na
Ethyelen-std_0.25mL	na	26109	349346	342630	48435001	1855.11	13.1231	11.1607	na	na
Ethyelen-std_0.75mL	na	24693	1289050	1282334	46553132	1885.28	51.9311	33.4821	na	na
Ethyelen-std_1.25mL	na	24838	2272782	2266066	47832514	1925.78	91.2338	55.8036	na	na
Ethyelen-std_2.5mL	na	29804	5738431	5731715	52890799	1774.62	192.314	111.607	na	na
Anc1A-rep1	0.25	28650	330159	323443	48364946	1688.13	11.2895	8.42694	2.06278	7.3014
	0.5	28275	655412	648696	48125781	1702.06	22.9424	15.1437	3.70693
	0.75	27622	997983	991267	46834725	1695.56	35.8869	22.6049	5.53332
	1	27893	1404112	1397396	47202875	1692.28	50.0984	30.7964	7.53848
Anc1A-rep2	0.25	29823	300019	293303	49786456	1669.4	9.83479	7.58847	1.58047	5.683
	0.5	28658	604037	597321	48056095	1676.88	20.8431	13.9337	2.90199
	0.75	28964	957279	950563	48537631	1675.79	32.8188	20.8364	4.33964
	1	28582	1301255	1294539	47555403	1663.82	45.2921	28.0261	5.83704
Anc1A-rep3	0.25	28512	257733	251017	48482025	1700.41	8.80391	6.99427	1.41387	5.2158
	0.5	28155	535022	528306	47787127	1697.29	18.7642	12.7354	2.57442
	0.75	27956	843102	836386	47071917	1683.79	29.9179	19.1644	3.87403
	1	27407	1168479	1161763	46278721	1688.57	42.3893	26.3529	5.32716

## Sheet: Anc1B
Sample	Acetylene (A) incubation time (h)	Methane (M) (879) peak area	Ethylene (E) peak area	E peak area blanked to 0 mL std	A peak area	A/M peak area	E/M peak area	E (μmol) (calc from std. curve; known values for E stds.)	E (μmol/mg total protein) (total protein calc from Bradford assay)	A reduction rate (μmol/mg/h)
Ethyelen-std_0mL	na	29550	6010	0	46545033	1575.13	0	0	na	na
Ethyelen-std_0.025mL	na	32952	42311	36301	49558248	1503.95	1.10163	1.11607	na	na
Ethyelen-std_0.25mL	na	27643	340430	334420	43114105	1559.68	12.0978	11.1607	na	na
Ethyelen-std_0.75mL	na	28980	1414161	1408151	46044591	1588.84	48.5904	33.4821	na	na
Ethyelen-std_1.25mL	na	29566	2423381	2417371	45895043	1552.29	81.7619	55.8036	na	na
Ethyelen-std_2.5mL	na	34815	6030473	6024463	52219182	1499.9	173.042	111.607	na	na
Anc1B-rep1	0.25	37307	440881	434871	52831362	1416.12	11.6566	9.15588	2.69674	11.061
	0.5	37587	955289	949279	53835111	1432.28	25.2555	17.8796	5.26621
	0.75	36819	1483471	1477461	52562683	1427.6	40.1277	27.4201	8.07623
	1	36524	2032476	2026466	51758344	1417.11	55.4831	37.2706	10.9776
Anc1B-rep2	0.25	32015	374124	368114	47800830	1493.08	11.4982	9.05428	1.8569	8.1703
	0.5	32502	860165	854155	48407308	1489.36	26.2801	18.5369	3.80164
	0.75	31571	1331680	1325670	46951009	1487.16	41.9901	28.6149	5.86849
	1	30815	1793687	1787677	45301601	1470.12	58.0132	38.8937	7.97652
Anc1B-rep3	0.25	31460	430057	424047	46884688	1490.3	13.4789	10.3249	2.00115	8.9586
	0.5	31321	961803	955793	46549574	1486.21	30.516	21.2542	4.11943
	0.75	30545	1499063	1493053	45293524	1482.85	48.8804	33.035	6.40274
	1	30858	2085879	2079869	44979921	1457.64	67.4013	44.9161	8.7055

## Sheet: Anc2
Sample	Acetylene (A) incubation time (h)	Methane (M) (879) peak area	Ethylene (E) peak area	E peak area blanked to 0 mL std	A peak area	A/M peak area	E/M peak area	E (μmol) (calc from std. curve; known values for E stds.)	E (μmol/mg total protein) (total protein calc from Bradford assay)	A reduction rate (μmol/mg/h)
Ethyelen-std_0mL	na	28160	8229	0	50274957	1785.33	0	0	na	na
Ethyelen-std_0.025mL	na	31658	51235	43006	55198447	1743.59	1.35846	1.11607	na	na
Ethyelen-std_0.25mL	na	28109	468118	459889	49347748	1755.59	16.3609	11.1607	na	na
Ethyelen-std_0.75mL	na	27695	1387924	1379695	49625913	1791.87	49.8175	33.4821	na	na
Ethyelen-std_1.25mL	na	27253	2514398	2506169	49643547	1821.58	91.9594	55.8036	na	na
Ethyelen-std_2.5mL	na	32392	6151733	6143504	55944326	1727.1	189.661	111.607	na	na
Anc2-rep1	0.25	31117	257851	249622	47749030	1534.5	8.02205	6.11682	1.38011	5.5684
	0.5	31346	595808	587579	48221697	1538.37	18.7449	12.4026	2.79833
	0.75	29667	871281	863052	45436960	1531.57	29.0913	18.4676	4.16676
	1	29528	1179254	1171025	45535083	1542.1	39.6581	24.6619	5.56434
Anc2-rep2	0.25	31878	266023	257794	48944749	1535.38	8.08689	6.15484	1.44969	5.8285
	0.5	30259	574894	566665	46475948	1535.94	18.7272	12.3922	2.9188
	0.75	30871	915594	907365	47662130	1543.91	29.3921	18.644	4.39133
	1	28624	1144888	1136659	44210832	1544.54	39.71	24.6923	5.81594
Anc2-rep3	0.25	33166	531814	523585	50779956	1531.08	15.7868	10.6685	1.90394	4.5774
	0.5	32023	741187	732958	49364373	1541.53	22.8885	14.8315	2.64688
	0.75	32149	1141714	1133485	49815212	1549.51	35.2572	22.0821	3.94084
	1	30135	1458498	1450269	46878441	1555.61	48.1257	29.6256	5.28708

## Sheet: Bradford
Standard trial 1	Standard trial 2	Standard trial 3	Standard Avg.	Standards (mg/ml)		Trial (x3 per ARA trial)	595nm Abs.	total mg (in 12.5 mL)	total mg (in 100mL culture)	mean total mg (per 100 mL culture)	standard dev
0.112	0.109	0.108	0.109667	0.125		WT-rep1-1	0.474	0.611834	4.89467	5.09237	0.171302
0.206	0.214	0.217	0.212333	0.25		WT-rep1-2	0.5	0.648203	5.18562
0.42	0.42	0.412	0.417333	0.5		WT-rep1-3	0.501	0.649601	5.19681
0.588	0.596	0.593	0.592333	0.75		WT-rep2-1	0.416	0.530704	4.24563	4.21579	0.0824855
0.73	0.743	0.711	0.728	1		WT-rep2-2	0.405	0.515317	4.12253
						WT-rep2-3	0.419	0.5349	4.2792
						WT-rep3-1	0.573	0.750315	6.00252	6.00252	0.123094
						WT-rep3-2	0.584	0.765701	6.12561
						WT-rep3-3	0.562	0.734928	5.87942
						Anc1A-rep1-1	0.416	0.530704	4.24563	4.08523	0.147753
						Anc1A-rep1-2	0.39	0.494335	3.95468
						Anc1A-rep1-3	0.399	0.506924	4.05539
						Anc1A-rep2-1	0.453	0.582459	4.65967	4.80142	0.295293
						Anc1A-rep2-2	0.448	0.575465	4.60372
						Anc1A-rep2-3	0.496	0.642607	5.14086
						Anc1A-rep3-1	0.5	0.648203	5.18562	4.94689	0.214182
						Anc1A-rep3-2	0.463	0.596447	4.77158
						Anc1A-rep3-3	0.473	0.610435	4.88348
						Anc1B-rep1-1	0.339	0.422996	3.38397	3.39516	0.0111904
						Anc1B-rep1-2	0.34	0.424395	3.39516
						Anc1B-rep1-3	0.341	0.425794	3.40635
						Anc1B-rep2-1	0.479	0.618828	4.95062	4.87602	0.0728091
						Anc1B-rep2-2	0.466	0.600643	4.80515
						Anc1B-rep2-3	0.472	0.609036	4.87229
						Anc1B-rep3-1	0.493	0.638411	5.10729	5.15951	0.0465893
						Anc1B-rep3-2	0.499	0.646804	5.17443
						Anc1B-rep3-3	0.501	0.649601	5.19681
						Anc2-rep1-1	0.444	0.56987	4.55896	4.43214	0.200596
						Anc2-rep1-2	0.412	0.525108	4.20087
						Anc2-rep1-3	0.442	0.567072	4.53658
						Anc2-rep2-1	0.41	0.522311	4.17849	4.24563	0.0733802
						Anc2-rep2-2	0.423	0.540495	4.32396
						Anc2-rep2-3	0.415	0.529305	4.23444
						Anc2-rep3-1	0.521	0.677577	5.42062	5.60339	0.197133
						Anc2-rep3-2	0.535	0.69716	5.57728
						Anc2-rep3-3	0.556	0.726535	5.81228

## Sheet: Statistics
WT	Anc1A	Anc1B	Anc2
14.604	7.3014	11.061	5.8285
13.165	5.683	8.9758	5.5684
11.504	5.2158	8.1703	4.5774
ANOVA: Single Factor										TUKEY HSD/KRAMER			alpha	0.05
										group	mean	n	ss	df	q-crit
DESCRIPTION					Alpha	0.05				WT	13.091	3	4.81321
Group	Count	Sum	Mean	Variance	SS	Std Err	Lower	Upper		Anc1A	6.06673	3	2.39574
WT	3	39.273	13.091	2.40661	4.81321	0.7226	11.4247	14.7573		Anc1B	9.40237	3	4.45101
Anc1A	3	18.2002	6.06673	1.19787	2.39574	0.7226	4.40041	7.73305		Anc2	5.32477	3	0.871661
Anc1B	3	28.2071	9.40237	2.22551	4.45101	0.7226	7.73605	11.0687				12	12.5316	8	4.529
Anc2	3	15.9743	5.32477	0.435831	0.871661	0.7226	3.65845	6.99109		Q TEST
										group 1	group 2	mean	std err	q-stat	lower	upper	p-value	mean-crit	Cohen d
ANOVA										WT	Anc1A	7.02427	0.7226	9.72082	3.75161	10.2969	0.000582695	3.27266	5.61232
Sources	SS	df	MS	F	P value	Eta-sq	RMSSE	Omega Sq		WT	Anc1B	3.68863	0.7226	5.10467	0.415977	6.96129	0.0283339	3.27266	2.94718
Between Groups	113.673	3	37.8911	24.1891	0.000229527	0.900704	2.83955	0.852882		WT	Anc2	7.76623	0.7226	10.7476	4.49358	11.0389	0.00028959	3.27266	6.20514
Within Groups	12.5316	8	1.56645							Anc1A	Anc1B	3.33563	0.7226	4.61615	0.0629767	6.60829	0.0458426	3.27266	2.66514
Total	126.205	11	11.4732							Anc1A	Anc2	0.741967	0.7226	1.0268	-2.53069	4.01462	0.884037	3.27266	0.592824
										Anc1B	Anc2	4.0776	0.7226	5.64295	0.804943	7.35026	0.0168746	3.27266	3.25796
