# Supplementary material for: Nitrogenase resurrection and the evolution of a singular enzymatic mechanism
Source: eLife. 2023 Feb 17;12:e85003. doi: 10.7554/eLife.85003 (PMC9977276; doi:10.7554/eLife.85003)
Supplement: Figure 3—source data 3. [file elife-85003-fig3-data3.xlsx]

## Sheet: Data
Sample	Total protein signal	NifD signal	NifD/total protein	mean	standard dev
DJ2102-rep1	64859.8	2373.04	0.0365873	0.0549236	0.0317198
DJ2102-rep2	51839.8	1899.04	0.0366329
DJ2102-rep3	51958.2	4756.8	0.0915505
Anc1A-rep1	45507.7	1591.21	0.0349658	0.063043	0.0395156
Anc1A-rep2	51009.9	2343.04	0.0459331
Anc1A-rep3	35361.8	3827.21	0.10823
Anc1B-rep1	53452.2	4149.04	0.0776216	0.102331	0.0283593
Anc1B-rep2	39619.7	3806.46	0.0960749
Anc1B-rep3	40681.2	5422.63	0.133296
Anc2-rep1	71212.3	6225.04	0.0874152	0.0939162	0.0400106
Anc2-rep2	38919.2	5323.34	0.136779
Anc2-rep3	38988	2243.92	0.0575541

## Sheet: Statistics
DJ2102	Anc1A	Anc1B	Anc2
0.0365873	0.0349658	0.0776216	0.0874152
0.0366329	0.0459331	0.0960749	0.136779
0.0915505	0.10823	0.133296	0.0575541
ANOVA: Single Factor										TUKEY HSD/KRAMER			alpha	0.05
										group	mean	n	ss	df	q-crit
DESCRIPTION					Alpha	0.05				DJ2102	0.0549236	3	0.0020123
Group	Count	Sum	Mean	Variance	SS	Std Err	Lower	Upper		Anc1A	0.063043	3	0.00312296
DJ2102	3	0.164771	0.0549236	0.00100615	0.0020123	0.0203567	0.00798098	0.101866		Anc1B	0.102331	3	0.0016085
Anc1A	3	0.189129	0.063043	0.00156148	0.00312296	0.0203567	0.0161004	0.109986		Anc2	0.0939162	3	0.0032017
Anc1B	3	0.306992	0.102331	0.000804251	0.0016085	0.0203567	0.0553881	0.149273				12	0.00994546	8	4.529
Anc2	3	0.281748	0.0939162	0.00160085	0.0032017	0.0203567	0.0469736	0.140859		Q TEST
										group 1	group 2	mean	std err	q-stat	lower	upper	p-value	mean-crit	Cohen d
ANOVA										DJ2102	Anc1A	0.00811947	0.0203567	0.39886	-0.0840759	0.100315	0.991563	0.0921954	0.230282
Sources	SS	df	MS	F	P value	Eta-sq	RMSSE	Omega Sq		DJ2102	Anc1B	0.0474071	0.0203567	2.32882	-0.0447883	0.139602	0.407597	0.0921954	1.34455
Between Groups	0.00480094	3	0.00160031	1.28727	0.343218	0.325567	0.65505	0.0670059		DJ2102	Anc2	0.0389926	0.0203567	1.91547	-0.0532028	0.131188	0.55768	0.0921954	1.1059
Within Groups	0.00994546	8	0.00124318							Anc1A	Anc1B	0.0392877	0.0203567	1.92996	-0.0529077	0.131483	0.552072	0.0921954	1.11427
Total	0.0147464	11	0.00134058							Anc1A	Anc2	0.0308731	0.0203567	1.51661	-0.0613222	0.123069	0.714658	0.0921954	0.875616
										Anc1B	Anc2	0.00841451	0.0203567	0.413354	-0.0837809	0.10061	0.990637	0.0921954	0.23865
