# Supplementary material for: Nitrogenase resurrection and the evolution of a singular enzymatic mechanism
Source: eLife. 2023 Feb 17;12:e85003. doi: 10.7554/eLife.85003 (PMC9977276; doi:10.7554/eLife.85003)
Supplement: Figure 4—source data 1. [file elife-85003-fig4-data1.xlsx]

## Sheet: H+
Sample	Time (min)	nmol protein	mg protein	uL H2	nmol H2	average	stdev	nmol/nmol/s	average	stdev	nmol/min/mg	average	stdev
WT-exp1	8	0.42	0.1	44.73	1859.74			9.2249			2324.67
WT-exp2	8	0.42	0.1	45.37	1886.35	1873.04	18.8156	9.35689	9.29089	0.0933314	2357.94	2341.3	23.5195
Anc1A-exp1	8	0.42	0.1	36.28	1508.41			7.48221			1885.52
Anc1A-exp2	8	0.42	0.1	38.74	1610.69	1559.55	72.3225	7.98955	7.73588	0.358742	2013.37	1949.44	90.4031
Anc2-exp1	8	0.42	0.1	16.56	688.515			3.41525			860.644
Anc2-exp2	8	0.42	0.1	17.95	746.307	717.411	40.8651	3.70192	3.55859	0.202704	932.884	896.764	51.0814
Anc1B-exp1	8	0.42	0.1	17.85	742.149			3.6813			927.687
Anc1B-exp2	8	0.42	0.1	14.53	604.114	673.132	97.6059	2.9966	3.33895	0.484156	755.142	841.415	122.007

## Sheet: C2H2
Sample	Time (min)	nmol protein	mg protein	uL C2H4	nmol C2H4	average	stdev	nmol/nmol/s	average	stdev	nmol/min/mg	average	stdev
WT-exp1	8	0.42	0.1	35.61	1480.56			7.34403			1850.7
WT-exp2	8	0.42	0.1	36.98	1537.52	1509.04	40.2772	7.62658	7.4853	0.199787	1921.9	1886.3	50.3464
Anc1A-exp1	8	0.42	0.1	27.53	1144.61			5.67765			1430.77
Anc1A-exp2	8	0.42	0.1	30.09	1251.05	1197.83	75.2624	6.20562	5.94163	0.373325	1563.81	1497.29	94.078
Anc2-exp1	8	0.42	0.1	15.02	624.487			3.09765			780.608
Anc2-exp2	8	0.42	0.1	14.37	597.462	610.974	19.1096	2.9636	3.03063	0.0947897	746.827	763.718	23.887
Anc1B-exp1	8	0.42	0.1	13.32	553.806			2.74705			692.257
Anc1B-exp2	8	0.42	0.1	13.59	565.031	559.419	7.93783	2.80274	2.77489	0.0393742	706.289	699.273	9.92229

## Sheet: N2
Sample	Time (min)	nmol protein	mg protein	fluorescence	normalized fluorescence	nmol NH4+ in 25 uL	nmol NH4+ in 1500 uL	average	stdev	nmol/nmol/s	average	stdev	nmol/min/mg	average	stdev		nmol NH4+	fluorescence	Argon backgrounds
WT-exp1	8	0.42	0.1	320.4	297.15	9.83262	589.957			2.92638			737.447				0	0	WT-exp1	23.1
WT-exp2	8	0.42	0.1	300.9	277.65	9.17515	550.509	570.233	27.8942	2.7307	2.82854	0.138364	688.136	712.791	34.8678		1.25	34.4	WT-exp2	23.4
Anc1A-exp1	8	0.42	0.1	255.9	235.6	7.75737	465.442			2.30874			581.802				2.5	91.1	Anc1A-exp1	20.6
Anc1A-exp2	8	0.42	0.1	289	268.7	8.87338	532.403	498.922	47.3487	2.64089	2.47481	0.234864	665.504	623.653	59.1858		5	155.4	Anc1A-exp2	20
Anc2-exp1	8	0.42	0.1	127.4	105.2	3.36072	201.643			1.00022			252.054				7.5	203.7	Anc2-exp1	22.4
Anc2-exp2	8	0.42	0.1	131.1	108.9	3.48547	209.128	205.386	5.29275	1.03734	1.01878	0.0262537	261.411	256.732	6.61594		10	344.4	Anc2-exp2	22
Anc1B-exp1	8	0.42	0.1	114.6	92.85	2.94432	176.659			0.876287			220.824				15	414.1	Anc1B-exp1	23.3
Anc1B-exp2	8	0.42	0.1	115.9	94.15	2.98816	179.289	177.974	1.85962	0.889332	0.882809	0.00922428	224.112	222.468	2.32452		20	638.2	Anc1B-exp2	20.2
																	25	726.5
