# Supplementary material for: Nitrogenase resurrection and the evolution of a singular enzymatic mechanism
Source: eLife. 2023 Feb 17;12:e85003. doi: 10.7554/eLife.85003 (PMC9977276; doi:10.7554/eLife.85003)
Supplement: Figure 4—source data 2. [file elife-85003-fig4-data2.xlsx]

## Sheet: Data
Strain	Condition	activity (nmol NH3/nmol MoFe protein/s)	mean activity (nmol NH3/nmol MoFe protein/s)
WT-exp1	0.4 atm Ar/0.6 atm N2	2.33	2.395
WT-exp2	0.4 atm Ar/0.6 atm N2	2.46
WT-exp1	0.4 atm H2/0.6 atm N2	1.46	1.43
WT-exp2	0.4 atm H2/0.6 atm N2	1.4
Anc1A-exp1	0.4 atm Ar/0.6 atm N2	0.440193	0.431449
Anc1A-exp2	0.4 atm Ar/0.6 atm N2	0.422706
Anc1A-exp1	0.4 atm H2/0.6 atm N2	0.1908	0.209975
Anc1A-exp2	0.4 atm H2/0.6 atm N2	0.229149
Anc1B-exp1	0.4 atm Ar/0.6 atm N2	0.513756	0.514661
Anc1B-exp2	0.4 atm Ar/0.6 atm N2	0.515565
Anc1B-exp1	0.4 atm H2/0.6 atm N2	0.243621	0.238496
Anc1B-exp2	0.4 atm H2/0.6 atm N2	0.23337
Anc2-exp1	0.4 atm Ar/0.6 atm N2	0.630734	0.677164
Anc2-exp2	0.4 atm Ar/0.6 atm N2	0.723593
Anc2-exp1	0.4 atm H2/0.6 atm N2	0.379292	0.384718
Anc2-exp2	0.4 atm H2/0.6 atm N2	0.390145
